# Supplementary material
Source: publisher site journal article supplement (https://www.dovepress.com/article/304278)
Supplement: Supplementary file 1 [file get_supplementary_file.php]

Supplementary Table 1. Zc3h12d-related gene set.

| Gene         | PearsonCC |
|--------------|-----------|
| GVIN1        | 0.69      |
| NLRC3        | 0.69      |
| LOC100188949 | 0.68      |
| TRAF3IP3     | 0.68      |
| SLAMF1       | 0.67      |
| ACAP1        | 0.67      |
| IL16         | 0.67      |
| IKZF1        | 0.67      |
| GPR174       | 0.66      |
| ITK          | 0.66      |
| AKNA         | 0.66      |
| SLAMF6       | 0.65      |
| BTLA         | 0.65      |
| PRKCB        | 0.65      |
| KLHL6        | 0.64      |
| ARHGAP30     | 0.64      |
| SEMA4D       | 0.64      |
| PPP1R16B     | 0.64      |
| CD6          | 0.64      |
| ITGAL        | 0.64      |
| RASAL3       | 0.64      |
| SASH3        | 0.64      |
| KIAA0748     | 0.63      |
| ARHGAP9      | 0.63      |
| ZAP70        | 0.63      |
| ARHGAP25     | 0.63      |
| PTPRC        | 0.62      |
| DOCK2        | 0.62      |
| PTPN7        | 0.62      |
| UBASH3A      | 0.62      |
| FAM78A       | 0.62      |
| FGD2         | 0.62      |
| TIGIT        | 0.62      |
| PYHIN1       | 0.62      |
| SNX20        | 0.62      |
| LOC100233209 | 0.62      |
| P2RY10       | 0.61      |
| ZBTB32       | 0.61      |
| IKZF3        | 0.61      |
| INPP5D       | 0.61      |
| IL10RA       | 0.61      |
| MAP4K1       | 0.61      |
| P2RY8        | 0.61      |
| RASGRP2      | 0.61      |
| TAGAP        | 0.61      |
| PVRIG        | 0.61      |
| CD247        | 0.6       |
| FCRL3        | 0.6       |
| EVI2B        | 0.6       |
| AGAP2        | 0.6       |
| JAK3         | 0.6       |
| CSF2RB       | 0.6       |
| TBC1D10C     | 0.6       |
| GPR114       | 0.6       |
| CD28         | 0.59      |
| CD5          | 0.59      |
| LTA          | 0.59      |
| PIK3CG       | 0.59      |
| CD226        | 0.59      |
| WIPF1        | 0.59      |

|           |      |
|-----------|------|
| IRF8      | 0.59 |
| PARP15    | 0.59 |
| ARHGEF6   | 0.58 |
| IL21R     | 0.58 |
| ICOS      | 0.58 |
| LY9       | 0.58 |
| WAS       | 0.58 |
| PLCG2     | 0.58 |
| CYTIP     | 0.58 |
| GAB3      | 0.58 |
| CD3E      | 0.58 |
| DOCK8     | 0.57 |
| ITGB7     | 0.57 |
| CORO1A    | 0.57 |
| GPR18     | 0.57 |
| CIITA     | 0.57 |
| CD3G      | 0.57 |
| CCR4      | 0.57 |
| SLFN12L   | 0.57 |
| TMC8      | 0.57 |
| CD2       | 0.57 |
| LOC283663 | 0.57 |
| DOK3      | 0.57 |
| CD19      | 0.57 |
| MS4A1     | 0.57 |
| LAX1      | 0.57 |
| TNFRSF13C | 0.57 |
| CCR7      | 0.56 |
| SIRPG     | 0.56 |
| IL12RB1   | 0.56 |
| CD27      | 0.56 |
| CD40LG    | 0.56 |
| IL2RB     | 0.56 |
| TRAT1     | 0.55 |
| CD180     | 0.55 |
| MYO1F     | 0.55 |
| BTN2A2    | 0.55 |
| RASSF2    | 0.55 |
| FMNL3     | 0.55 |
| FOXP3     | 0.55 |
| GIMAP1    | 0.55 |
| FAIM3     | 0.55 |
| GIMAP7    | 0.54 |
| DENND1C   | 0.54 |
| SLA2      | 0.54 |
| CCR6      | 0.54 |
| RHOH      | 0.54 |
| SH2D1A    | 0.54 |
| CD37      | 0.54 |
| POU2F2    | 0.54 |
| MIR155HG  | 0.54 |
| PTPRCAP   | 0.54 |
| LPXN      | 0.54 |
| CCR8      | 0.54 |
| LILRB1    | 0.54 |
| CPNE5     | 0.54 |
| ZBP1      | 0.54 |
| CCR5      | 0.54 |
| NCR3      | 0.54 |
| GFI1      | 0.53 |
| ICAM3     | 0.53 |
| CYTH4     | 0.53 |

|           |      |
|-----------|------|
| GIT2      | 0.53 |
| BLK       | 0.53 |
| CXCR5     | 0.53 |
| SAMD3     | 0.53 |
| RUNX3     | 0.53 |
| BIN2      | 0.53 |
| NCF1B     | 0.53 |
| PRDM1     | 0.53 |
| NCKAP1L   | 0.53 |
| POU2AF1   | 0.52 |
| PIK3CD    | 0.52 |
| CYLD      | 0.52 |
| PIK3R5    | 0.52 |
| DOCK10    | 0.52 |
| THEMIS    | 0.52 |
| STK4      | 0.52 |
| TRAF1     | 0.52 |
| NDST2     | 0.52 |
| EOMES     | 0.52 |
| GRAP      | 0.52 |
| VAMP1     | 0.52 |
| STAP1     | 0.52 |
| BTK       | 0.51 |
| GCET2     | 0.51 |
| LCP2      | 0.51 |
| CD22      | 0.51 |
| EVL       | 0.51 |
| CLECL1    | 0.51 |
| STAT5A    | 0.51 |
| TIFAB     | 0.51 |
| CXorf21   | 0.51 |
| SIT1      | 0.51 |
| CXCR4     | 0.51 |
| CD53      | 0.51 |
| CD84      | 0.51 |
| P2RY13    | 0.51 |
| CD1D      | 0.51 |
| LTB       | 0.51 |
| RASGRP3   | 0.5  |
| MPEG1     | 0.5  |
| KLRB1     | 0.5  |
| TNFRSF13B | 0.5  |
| FGD3      | 0.5  |
| LCK       | 0.5  |
| PARVG     | 0.5  |
| PTK2B     | 0.5  |
| ATM       | 0.5  |
| IL7R      | 0.5  |
| TLR9      | 0.5  |
| PIM2      | 0.5  |
| C17orf87  | 0.5  |
| C13orf18  | 0.5  |
| CLEC2D    | 0.5  |
| GIMAP5    | 0.5  |
| PSTPIP1   | 0.5  |
| BCL11B    | 0.5  |
| PLEK      | 0.5  |
| FERMT3    | 0.5  |
| SLA       | 0.5  |
| GIMAP4    | 0.5  |
| HVCN1     | 0.5  |
| ANKRD44   | 0.5  |

|           |      |
|-----------|------|
| CCR2      | 0.5  |
| HCLS1     | 0.5  |
| TRANK1    | 0.49 |
| STK10     | 0.49 |
| CD4       | 0.49 |
| DEF6      | 0.49 |
| C5orf56   | 0.49 |
| NCF1      | 0.49 |
| SP140     | 0.49 |
| FCRL5     | 0.49 |
| SNAI3     | 0.49 |
| TCF7      | 0.49 |
| SPN       | 0.49 |
| CTLA4     | 0.49 |
| RAPGEF1   | 0.48 |
| PLCL2     | 0.48 |
| GIMAP6    | 0.48 |
| IL18RAP   | 0.48 |
| PTPN6     | 0.48 |
| SMAP2     | 0.48 |
| CD79B     | 0.48 |
| GNG2      | 0.48 |
| ABI3      | 0.48 |
| MICAL1    | 0.48 |
| FLI1      | 0.48 |
| PREX1     | 0.48 |
| PLA2G2D   | 0.48 |
| KCNAB2    | 0.48 |
| APBB1IP   | 0.48 |
| KLRG1     | 0.47 |
| TNFRSF1B  | 0.47 |
| KIF21B    | 0.47 |
| SCML4     | 0.47 |
| NCF1C     | 0.47 |
| NFAM1     | 0.47 |
| ITGA4     | 0.47 |
| IRF4      | 0.47 |
| NFATC2    | 0.47 |
| FNBP1     | 0.47 |
| GZMK      | 0.47 |
| CARD8     | 0.47 |
| CXCR6     | 0.47 |
| CECR1     | 0.47 |
| C14orf139 | 0.47 |
| KBTD8     | 0.46 |
| BANK1     | 0.46 |
| TFEC      | 0.46 |
| P2RX1     | 0.46 |
| IL2RG     | 0.46 |
| GRAP2     | 0.46 |
| PDCD1     | 0.46 |
| RBP5      | 0.46 |
| GIMAP8    | 0.46 |
| ADORA2A   | 0.46 |
| C6orf204  | 0.46 |
| PTGDS     | 0.46 |
| CD79A     | 0.46 |
| ZZEF1     | 0.46 |
| HERC1     | 0.46 |
| NLRP1     | 0.46 |
| S1PR4     | 0.46 |
| RORA      | 0.46 |

|          |      |
|----------|------|
| STAT5B   | 0.46 |
| CD200R1  | 0.46 |
| SELPLG   | 0.46 |
| ADAM6    | 0.46 |
| RNF166   | 0.46 |
| AOAH     | 0.46 |
| PATL2    | 0.46 |
| FUT7     | 0.46 |
| FLJ40330 | 0.46 |
| IL18BP   | 0.45 |
| ARID5A   | 0.45 |
| CR1      | 0.45 |
| CD3D     | 0.45 |
| LRRC33   | 0.45 |
| MCOLN2   | 0.45 |
| PAX5     | 0.45 |
| HECA     | 0.45 |
| MSL3     | 0.45 |
| TMEM149  | 0.45 |
| NAIP     | 0.45 |
| FLT3LG   | 0.45 |
| C11orf21 | 0.45 |
| CCL19    | 0.44 |
| DDX26B   | 0.44 |
| LRRK1    | 0.44 |
| NLRC5    | 0.44 |
| SIGLEC10 | 0.44 |
| GPR65    | 0.44 |
| SSH2     | 0.44 |
| PPP3CC   | 0.44 |
| KLRK1    | 0.44 |
| JAK2     | 0.44 |
| CMKLR1   | 0.44 |
| RASSF4   | 0.44 |
| PLXNC1   | 0.44 |
| STARD5   | 0.44 |
| CD72     | 0.44 |
| FAM46C   | 0.44 |
| ZNF366   | 0.44 |
| CRTAM    | 0.44 |
| SH2B3    | 0.44 |
| APOL3    | 0.44 |
| UBE2J1   | 0.43 |
| GPSM3    | 0.43 |
| GMIP     | 0.43 |
| TBC1D2B  | 0.43 |
| FCRLA    | 0.43 |
| SEC31B   | 0.43 |
| LILRA4   | 0.43 |
| SLAMF8   | 0.43 |
| GAPT     | 0.43 |
| SFRS18   | 0.43 |
| PNOC     | 0.43 |
| MEI1     | 0.43 |
| P2RX7    | 0.43 |
| ZEB2     | 0.43 |
| ZBTB40   | 0.43 |
| MYCBP2   | 0.43 |
| FYB      | 0.43 |
| C14orf49 | 0.43 |
| FMNL1    | 0.42 |
| SETX     | 0.42 |

|           |      |
|-----------|------|
| TMEM229B  | 0.42 |
| LCP1      | 0.42 |
| NAPSB     | 0.42 |
| PARP11    | 0.42 |
| FNBP4     | 0.42 |
| SYK       | 0.42 |
| RASSF5    | 0.42 |
| CAMK4     | 0.42 |
| LOC606724 | 0.42 |
| MAP3K12   | 0.42 |
| ITGAX     | 0.42 |
| GAS7      | 0.42 |
| NRIP2     | 0.42 |
| ZNF224    | 0.42 |
| ZNF101    | 0.42 |
| ETS1      | 0.42 |
| TNFSF8    | 0.42 |
| CNOT6L    | 0.42 |
| ZNF169    | 0.42 |
| PAPLN     | 0.42 |
| IQSEC1    | 0.41 |
| LYL1      | 0.41 |
| VASH1     | 0.41 |
| IFFO1     | 0.41 |
| AMICA1    | 0.41 |
| SLAMF7    | 0.41 |
| HLA-DOB   | 0.41 |
| MAST3     | 0.41 |
| SETDB2    | 0.41 |
| TRIM22    | 0.41 |
| KIAA1755  | 0.41 |
| C1orf152  | 0.41 |
| XRN1      | 0.41 |
| GBP5      | 0.41 |
| APOBEC3D  | 0.41 |
| FRMD4A    | 0.41 |
| CXCR3     | 0.41 |
| CORO7     | 0.41 |
| SLC8A1    | 0.41 |
| TNFAIP3   | 0.41 |
| BTAF1     | 0.41 |
| RAC2      | 0.41 |
| PCNX      | 0.41 |
| EBI3      | 0.41 |
| TLR7      | 0.41 |
| CEP110    | 0.41 |
| VAV1      | 0.41 |
| GYPC      | 0.4  |
| CXCR2P1   | 0.4  |
| HLA-DOA   | 0.4  |
| N4BP2L1   | 0.4  |
| PIK3AP1   | 0.4  |
| FASLG     | 0.4  |
| MMP25     | 0.4  |
| BTN3A1    | 0.4  |
| BLNK      | 0.4  |
| LIMD2     | 0.4  |
| TP53INP1  | 0.4  |
| BTN3A3    | 0.4  |
| PIKFYVE   | 0.4  |
| CYBB      | 0.4  |
| LOC202181 | 0.4  |

|              |      |
|--------------|------|
| FAM13B       | 0.4  |
| LENG8        | 0.4  |
| C10orf54     | 0.4  |
| NR2C2        | 0.4  |
| PLEKHO2      | 0.4  |
| INPP4A       | 0.4  |
| VPREB3       | 0.4  |
| ANKDD1A      | 0.39 |
| SAMHD1       | 0.39 |
| ABCA6        | 0.39 |
| DOPEY1       | 0.39 |
| TSPAN32      | 0.39 |
| PPM1M        | 0.39 |
| RASSF1       | 0.39 |
| SELP         | 0.39 |
| HERPUD1      | 0.39 |
| C17orf68     | 0.39 |
| TSSK4        | 0.39 |
| SIRPB2       | 0.39 |
| GIMAP2       | 0.39 |
| LILRB4       | 0.39 |
| SLCO2B1      | 0.39 |
| MAN2B1       | 0.39 |
| LOC283314    | 0.39 |
| MFNG         | 0.39 |
| CLEC10A      | 0.39 |
| HCG26        | 0.39 |
| RALGDS       | 0.39 |
| TNFRSF17     | 0.39 |
| CD8A         | 0.39 |
| NOTCH1       | 0.39 |
| FYN          | 0.39 |
| SUSD3        | 0.39 |
| DERL3        | 0.39 |
| RFX5         | 0.39 |
| LOC100190986 | 0.39 |
| ZBTB46       | 0.38 |
| MAP3K14      | 0.38 |
| TRIM66       | 0.38 |
| MAP3K1       | 0.38 |
| NCF4         | 0.38 |
| POU6F1       | 0.38 |
| MGC29506     | 0.38 |
| HLA-DPB1     | 0.38 |
| PLCB2        | 0.38 |
| VPS13C       | 0.38 |
| MAP3K3       | 0.38 |
| LOC96610     | 0.38 |
| PIK3R6       | 0.38 |
| LOC641298    | 0.38 |
| GGTA1        | 0.38 |
| FAM53B       | 0.38 |
| PRKCH        | 0.38 |
| KAT2B        | 0.38 |
| C15orf27     | 0.38 |
| SLC9A9       | 0.38 |
| CEP120       | 0.38 |
| HLA-DQA1     | 0.38 |
| CASS4        | 0.38 |
| FCHSD2       | 0.38 |
| CD48         | 0.38 |
| NKTR         | 0.38 |

|           |      |
|-----------|------|
| SH2D3C    | 0.38 |
| SLC2A6    | 0.38 |
| LOC728743 | 0.38 |
| ENTPD1    | 0.38 |
| HLA-E     | 0.38 |
| P2RX5     | 0.38 |
| CD80      | 0.38 |
| LAPTM5    | 0.38 |
| GP1BA     | 0.37 |
| MYO9B     | 0.37 |
| C9orf45   | 0.37 |
| TLR8      | 0.37 |
| NFKBID    | 0.37 |
| FCHSD1    | 0.37 |
| LAIR1     | 0.37 |
| ZNF276    | 0.37 |
| TNFSF13B  | 0.37 |
| ITGB2     | 0.37 |
| ITPKB     | 0.37 |
| KIAA0125  | 0.37 |
| ZNF780B   | 0.37 |
| WDR37     | 0.37 |
| UBA7      | 0.37 |
| AMPD3     | 0.37 |
| HCFC2     | 0.37 |
| ANKRD58   | 0.37 |
| ABI3BP    | 0.37 |
| C12orf51  | 0.37 |
| ZNF767    | 0.37 |
| FKBP15    | 0.37 |
| CD69      | 0.37 |
| MED13L    | 0.37 |
| SIGLEC8   | 0.37 |
| RELT      | 0.37 |
| RCSD1     | 0.37 |
| ADRBK1    | 0.37 |
| RBM5      | 0.37 |
| TSTD2     | 0.37 |
| ZNF333    | 0.37 |
| SNRK      | 0.37 |
| NOD2      | 0.37 |
| MCM9      | 0.37 |
| EIF2C4    | 0.37 |
| CXCL13    | 0.36 |
| CHFR      | 0.36 |
| RBM6      | 0.36 |
| IGSF6     | 0.36 |
| CALHM2    | 0.36 |
| GMFG      | 0.36 |
| CD86      | 0.36 |
| SPI1      | 0.36 |
| ADAMDEC1  | 0.36 |
| CSK       | 0.36 |
| PCF11     | 0.36 |
| GGA2      | 0.36 |
| SMCR8     | 0.36 |
| TM6SF1    | 0.36 |
| TRAF3     | 0.36 |
| BHLHE22   | 0.36 |
| BTN2A3    | 0.36 |
| SHPRH     | 0.36 |
| KIAA1274  | 0.36 |



|           |      |
|-----------|------|
| EZH1      | 0.36 |
| RLTPR     | 0.36 |
| KLHL3     | 0.36 |
| ZNF275    | 0.36 |
| WDR7      | 0.36 |
| DOK2      | 0.36 |
| CYFIP2    | 0.36 |
| STAG3L3   | 0.36 |
| PXK       | 0.36 |
| CYTH1     | 0.36 |
| PHC3      | 0.36 |
| KIAA0247  | 0.36 |
| TATDN2    | 0.36 |
| IL4I1     | 0.36 |
| IKZF4     | 0.36 |
| FPR3      | 0.36 |
| SPATA13   | 0.36 |
| FAM159A   | 0.36 |
| MEF2B     | 0.36 |
| STARD8    | 0.36 |
| RASA2     | 0.36 |
| POPDC2    | 0.36 |
| ANKRD12   | 0.36 |
| PTGER4    | 0.36 |
| C1orf38   | 0.36 |
| CBX7      | 0.36 |
| HLA-DPA1  | 0.36 |
| ITM2A     | 0.36 |
| HLA-L     | 0.36 |
| PHF21A    | 0.36 |
| LOC338799 | 0.35 |
| NPHP3     | 0.35 |
| LOC283922 | 0.35 |
| ARHGAP4   | 0.35 |
| TRIM78P   | 0.35 |
| LY75      | 0.35 |
| GPRIN3    | 0.35 |
| KCTD12    | 0.35 |
| TNFAIP8L2 | 0.35 |
| KCNN3     | 0.35 |
| PDE4B     | 0.35 |
| KLF13     | 0.35 |
| ZNF234    | 0.35 |
| TBC1D4    | 0.35 |
| CD244     | 0.35 |
| TNFAIP8   | 0.35 |
| TBC1D9    | 0.35 |
| GBP4      | 0.35 |
| HMHA1     | 0.35 |
| TLR10     | 0.35 |
| TBRG1     | 0.35 |
| COL29A1   | 0.35 |
| MYO18A    | 0.35 |
| TLR4      | 0.35 |
| RNF125    | 0.35 |
| TLN1      | 0.35 |
| ZNF37B    | 0.35 |
| DMXL2     | 0.35 |
| TRIM52    | 0.35 |
| KIAA2026  | 0.35 |
| EPB41L2   | 0.35 |
| CXCL9     | 0.35 |

|           |      |
|-----------|------|
| PPWD1     | 0.35 |
| CLK4      | 0.35 |
| ACAD11    | 0.35 |
| YTHDC2    | 0.35 |
| SLC15A3   | 0.35 |
| C20orf194 | 0.35 |
| C5orf41   | 0.35 |
| ZNF81     | 0.35 |
| JAZF1     | 0.35 |
| APOBEC3G  | 0.35 |
| MOBK2A    | 0.35 |
| MAFB      | 0.35 |
| SIGLEC14  | 0.35 |
| MNDA      | 0.35 |
| C3orf42   | 0.35 |
| OGT       | 0.35 |
| ARHGEF1   | 0.35 |
| NBPF9     | 0.35 |
| MYSM1     | 0.35 |
| SLC25A45  | 0.35 |
| SENP7     | 0.35 |
| TNFRSF4   | 0.35 |
| MYO5A     | 0.35 |
| CENPC1    | 0.35 |
| RTN1      | 0.34 |
| SELL      | 0.34 |
| IRF2      | 0.34 |
| ERN1      | 0.34 |
| TMEM140   | 0.34 |
| SGK3      | 0.34 |
| TRAFD1    | 0.34 |
| ACP2      | 0.34 |
| PRPF38B   | 0.34 |
| LPAR6     | 0.34 |
| RAPGEF6   | 0.34 |
| IRF1      | 0.34 |
| RBM33     | 0.34 |
| LOC650623 | 0.34 |
| TRPV2     | 0.34 |
| SAMD9L    | 0.34 |
| CLK1      | 0.34 |
| SMG1      | 0.34 |
| PLA2G7    | 0.34 |
| ZNF782    | 0.34 |
| LRRC8C    | 0.34 |
| TTBK2     | 0.34 |
| FCRL2     | 0.34 |
| AGXT2L2   | 0.34 |
| ARHGAP15  | 0.34 |
| DENND4A   | 0.34 |
| IGJ       | 0.34 |
| DCP2      | 0.34 |
| C16orf54  | 0.34 |
| ATG2B     | 0.34 |
| HCST      | 0.34 |
| ATP8B4    | 0.34 |
| CD74      | 0.34 |
| CCL5      | 0.34 |
| LAP3      | 0.34 |
| MLL2      | 0.34 |
| GRK6      | 0.34 |
| CTSS      | 0.34 |

|            |      |
|------------|------|
| STX11      | 0.34 |
| IL2RA      | 0.34 |
| ARID4A     | 0.34 |
| FGR        | 0.34 |
| ENTPD4     | 0.34 |
| RNF38      | 0.34 |
| PLEKHO1    | 0.34 |
| ZNF589     | 0.34 |
| PPP1R9B    | 0.34 |
| RNASE6     | 0.34 |
| P2RY12     | 0.34 |
| SFRS2IP    | 0.34 |
| MSL2       | 0.34 |
| NIN        | 0.34 |
| GNPTAB     | 0.34 |
| STAC3      | 0.34 |
| PIK3IP1    | 0.34 |
| PDCD4      | 0.33 |
| PDCD1LG2   | 0.33 |
| BMP2K      | 0.33 |
| ATP6V1B2   | 0.33 |
| C9orf102   | 0.33 |
| DMTF1      | 0.33 |
| LILRB3     | 0.33 |
| SIRPA      | 0.33 |
| HELB       | 0.33 |
| HAVCR2     | 0.33 |
| ZCCHC24    | 0.33 |
| DENND3     | 0.33 |
| RAB30      | 0.33 |
| ZNF510     | 0.33 |
| CD83       | 0.33 |
| USP20      | 0.33 |
| KIAA0664P3 | 0.33 |
| ZNF641     | 0.33 |
| GJD3       | 0.33 |
| SPIB       | 0.33 |
| C1R        | 0.33 |
| ERAP1      | 0.33 |
| TUBGCP6    | 0.33 |
| DOCK11     | 0.33 |
| ARID1B     | 0.33 |
| GNG7       | 0.33 |
| MADD       | 0.33 |
| ARRB2      | 0.33 |
| FLJ45340   | 0.33 |
| RPL32P3    | 0.33 |
| DNAJC27    | 0.33 |
| PRKCQ      | 0.33 |
| RAD54L2    | 0.33 |
| SFRS17A    | 0.33 |
| NLRP3      | 0.33 |
| RGAG4      | 0.33 |
| RRN3P1     | 0.33 |
| TMOD2      | 0.33 |
| KIAA1432   | 0.33 |
| ZFC3H1     | 0.33 |
| CTSZ       | 0.33 |
| CSF1R      | 0.33 |
| BTN2A1     | 0.33 |
| TYK2       | 0.33 |
| IL17RA     | 0.33 |

|           |      |
|-----------|------|
| CG030     | 0.33 |
| ATP8B2    | 0.33 |
| PNRC1     | 0.33 |
| SAP30L    | 0.33 |
| LAT       | 0.32 |
| SECISBP2  | 0.32 |
| PPP1R12C  | 0.32 |
| FCGR2C    | 0.32 |
| LOC90834  | 0.32 |
| KCTD7     | 0.32 |
| TMEM119   | 0.32 |
| RASA3     | 0.32 |
| KIAA2018  | 0.32 |
| C10orf128 | 0.32 |
| VPS13A    | 0.32 |
| ADPRH     | 0.32 |
| HSH2D     | 0.32 |
| MGEA5     | 0.32 |
| IRAK4     | 0.32 |
| DDX5      | 0.32 |
| CCDC66    | 0.32 |
| PKD1      | 0.32 |
| BTN3A2    | 0.32 |
| DGKZ      | 0.32 |
| SENP6     | 0.32 |
| TNK2      | 0.32 |
| SF3B1     | 0.32 |
| MON2      | 0.32 |
| PPIL4     | 0.32 |
| FAM122A   | 0.32 |
| ENPP2     | 0.32 |
| SLC31A2   | 0.32 |
| SP2       | 0.32 |
| AKAP11    | 0.32 |
| TAPBPL    | 0.32 |
| NKG7      | 0.32 |
| GZMA      | 0.32 |
| ZNF449    | 0.32 |
| SAMSN1    | 0.32 |
| TCHP      | 0.32 |
| SLC7A7    | 0.32 |
| ANXA6     | 0.32 |
| KLF12     | 0.32 |
| CREBL2    | 0.32 |
| HAAO      | 0.32 |
| MDM4      | 0.32 |
| RGS18     | 0.32 |
| SRRM2     | 0.32 |
| CCDC50    | 0.32 |
| CYBASC3   | 0.32 |
| WDFY4     | 0.32 |
| SEL1L     | 0.32 |
| SFRS14    | 0.32 |
| SGK269    | 0.32 |
| TTC14     | 0.32 |
| TFEB      | 0.32 |
| EGR2      | 0.32 |
| LSP1      | 0.32 |
| STX17     | 0.32 |
| SNX29     | 0.32 |
| ARGLU1    | 0.32 |
| COL16A1   | 0.32 |

|            |      |
|------------|------|
| HAPLN3     | 0.32 |
| PDE3B      | 0.32 |
| MLXIP      | 0.32 |
| GPATCH8    | 0.31 |
| SHANK3     | 0.31 |
| CRLF3      | 0.31 |
| KCNA3      | 0.31 |
| ANKRD36    | 0.31 |
| CD101      | 0.31 |
| LOC253039  | 0.31 |
| RCBTB2     | 0.31 |
| ARHGAP17   | 0.31 |
| MINK1      | 0.31 |
| DNAH1      | 0.31 |
| RBL2       | 0.31 |
| ZNF267     | 0.31 |
| CCNL1      | 0.31 |
| ZBTB1      | 0.31 |
| CDC42SE2   | 0.31 |
| INPP5E     | 0.31 |
| C14orf145  | 0.31 |
| HLA-DRA    | 0.31 |
| NISCH      | 0.31 |
| CSGALNACT2 | 0.31 |
| ZC3H7A     | 0.31 |
| PARP14     | 0.31 |
| DENND4B    | 0.31 |
| XPC        | 0.31 |
| CDC40      | 0.31 |
| CALCOCO1   | 0.31 |
| AAK1       | 0.31 |
| CLN8       | 0.31 |
| MS4A6A     | 0.31 |
| TMEM106A   | 0.31 |
| DPEP2      | 0.31 |
| ZNF785     | 0.31 |
| CDC14A     | 0.31 |
| LSAMP      | 0.31 |
| MTMR9L     | 0.31 |
| CCDC69     | 0.31 |
| ZNF438     | 0.31 |
| RBM39      | 0.31 |
| SYNRG      | 0.31 |
| NEU3       | 0.31 |
| TRIM69     | 0.31 |
| NXF1       | 0.31 |
| FAM26F     | 0.31 |
| CCDC93     | 0.31 |
| ST3GAL2    | 0.31 |
| STAT2      | 0.31 |
| HERC2P2    | 0.31 |
| HK3        | 0.31 |
| UNKL       | 0.31 |
| LRP1       | 0.31 |
| SLC1A3     | 0.31 |
| MAF        | 0.31 |
| LAMA2      | 0.31 |
| LATS1      | 0.31 |
| TNRC6C     | 0.31 |
| FGD5       | 0.31 |
| TLR1       | 0.31 |
| INE1       | 0.31 |

|              |      |
|--------------|------|
| ATXN7        | 0.31 |
| PAPD4        | 0.31 |
| C1S          | 0.31 |
| ABCA2        | 0.31 |
| AKAP7        | 0.31 |
| ZFYVE26      | 0.31 |
| EXOG         | 0.31 |
| VHL          | 0.31 |
| TRAF5        | 0.31 |
| CARD9        | 0.31 |
| FAM160A2     | 0.31 |
| ZDHHC17      | 0.31 |
| LOC339047    | 0.31 |
| LOC100129034 | 0.31 |
| DDHD1        | 0.31 |
| C14orf43     | 0.31 |
| LRRC25       | 0.31 |
| SFMBT2       | 0.31 |
| ATG16L2      | 0.31 |
| SPARCL1      | 0.31 |
| C18orf1      | 0.31 |
| LILRB2       | 0.31 |
| RG9MTD3      | 0.31 |
| CCL4         | 0.31 |
| C3AR1        | 0.31 |
| ZNF546       | 0.31 |
| FLJ10213     | 0.31 |
| C12orf35     | 0.31 |
| ADRBK2       | 0.31 |
| LOC100128842 | 0.3  |
| STAMBPL1     | 0.3  |
| KDM2B        | 0.3  |
| DUSP2        | 0.3  |
| ITGAM        | 0.3  |
| FAM116A      | 0.3  |
| BAZ2A        | 0.3  |
| STX16        | 0.3  |
| SERPINB9     | 0.3  |
| RGS1         | 0.3  |
| KIAA1109     | 0.3  |
| BAZ2B        | 0.3  |
| ANKRD13A     | 0.3  |
| KCNIP2       | 0.3  |
| TLR6         | 0.3  |
| LAG3         | 0.3  |
| ZNF407       | 0.3  |
| GOLGA8A      | 0.3  |
| LOC389333    | 0.3  |
| KIAA1033     | 0.3  |
| SFRS5        | 0.3  |
| DAPP1        | 0.3  |
| ATP6V0A2     | 0.3  |
| LOC286367    | 0.3  |
| PASK         | 0.3  |
| SGIP1        | 0.3  |
| RASA4        | 0.3  |
| AIF1         | 0.3  |
| KIAA1009     | 0.3  |
| TNFRSF25     | 0.3  |
| TEP1         | 0.3  |
| FBXW7        | 0.3  |
| MAPK8IP3     | 0.3  |

|           |       |
|-----------|-------|
| ZNF671    | 0.3   |
| IL18R1    | 0.3   |
| CEP135    | 0.3   |
| MEF2A     | 0.3   |
| ZBTB26    | 0.3   |
| TXNDC5    | 0.3   |
| EPC1      | 0.3   |
| SH3TC1    | 0.3   |
| PTAFR     | 0.3   |
| ZNF791    | 0.3   |
| FAM193B   | 0.3   |
| NPL       | 0.3   |
| FAM55C    | 0.3   |
| NIPSNAP3B | 0.3   |
| QKI       | 0.3   |
| SH3BP1    | 0.3   |
| BMS1P5    | 0.3   |
| TMEM110   | 0.3   |
| LNPEP     | 0.3   |
| PAN2      | 0.3   |
| HLA-DMB   | 0.3   |
| CREBZF    | 0.3   |
| MYO7A     | 0.3   |
| HLA-DRB1  | 0.3   |
| EVI2A     | 0.3   |
| EPS15     | 0.3   |
| PRF1      | 0.3   |
| TRIM14    | 0.3   |
| NFKB1     | 0.3   |
| C17orf39  | 0.3   |
| RBM25     | 0.3   |
| SLC36A1   | 0.3   |
| COL6A6    | 0.3   |
| CROCCL2   | 0.3   |
| ELL       | 0.3   |
| PPP1R3E   | 0.3   |
| PAN3      | 0.3   |
| PLEKHA2   | 0.3   |
| LRRC37A2  | 0.3   |
| STAT4     | 0.3   |
| FLJ10038  | 0.3   |
| KIAA0430  | 0.3   |
| AHSA2     | 0.3   |
| CCDC88B   | 0.3   |
| CELF1     | 0.3   |
| KLRAQ1    | 0.3   |
| HCG27     | 0.3   |
| PHF2      | 0.3   |
| ALS2CR8   | 0.3   |
| EPM2AIP1  | 0.3   |
| ALOX5     | 0.3   |
| APOL6     | 0.3   |
| ABCA1     | 0.3   |
| USPL1     | 0.3   |
| ZNF236    | 0.3   |
| GM2A      | 0.3   |
| KIAA1310  | 0.3   |
| ATP5H     | -0.34 |
| ZNF593    | -0.31 |
| MRPS15    | -0.31 |
| NME2      | -0.3  |
| EIF5A     | -0.3  |

|          |      |
|----------|------|
| C19orf53 | -0.3 |
| TCEB2    | -0.3 |
| C19orf33 | -0.3 |
